# Supplementary material for: Microtubule-targeting drugs rescue axonal swellings in cortical neurons from spastin knockout mice
Source: PubMed Central journal article supplement — Dis Model Mech. 2012 Jul 5;6(1):72–83. doi: 10.1242/dmm.008946 (PMC3529340; doi:10.1242/dmm.008946), 2012-07-05
Supplement: supp_008946_DMM008946.pdf [file supp_008946_DMM008946.pdf]

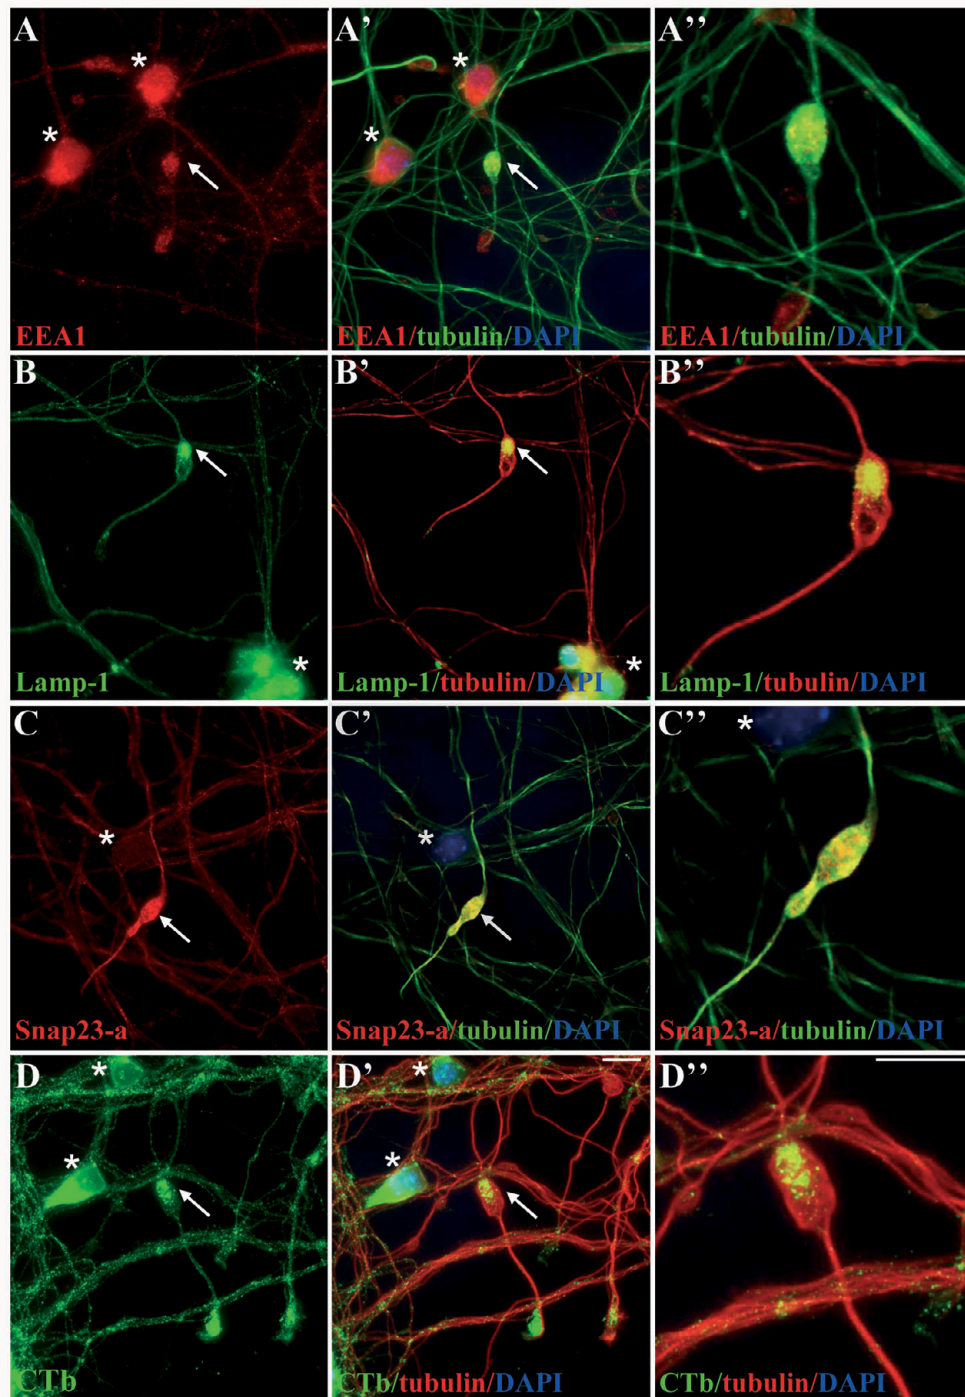

**Fig. S1. Retrograde axonal transport defect is not restricted to a subtype of organelles in  $Sp^{-/-}$  neurons.** (A-A'') Primary cultures of  $Sp^{-/-}$  cortical neurons were incubated at DIV5, with 1  $\mu\text{g}/\text{ml}$  of the neuronal retrograde tracer AlexaFlour488-conjugated CTb (A), washed in CTb-free medium, fixed and processed for immunolabeling with acetylated  $\alpha$ -tubulin antibody (A', A''). Many CTb-positive vesicles are accumulated within the proximal part of the swellings (A-A''; arrows). (B-D'') Co-immunolabeling of acetylated  $\alpha$ -tubulin (tubulin; B', B'', C', C'', D' and D'') and endosomes (EEA1; B, B''), lysosomes (Lamp1; C, C''), synaptic vesicles (Snap23a; D, D'') in DIV6 primary cultures of  $Sp^{-/-}$  cortical neurons. All these organelles are equally accumulated within axonal swellings (B-D''; arrows). (A-D'') Nuclei are stained with DAPI (asterisks). A''-D'' are higher magnifications of A'-D'. Scale bars: 10  $\mu\text{m}$ .

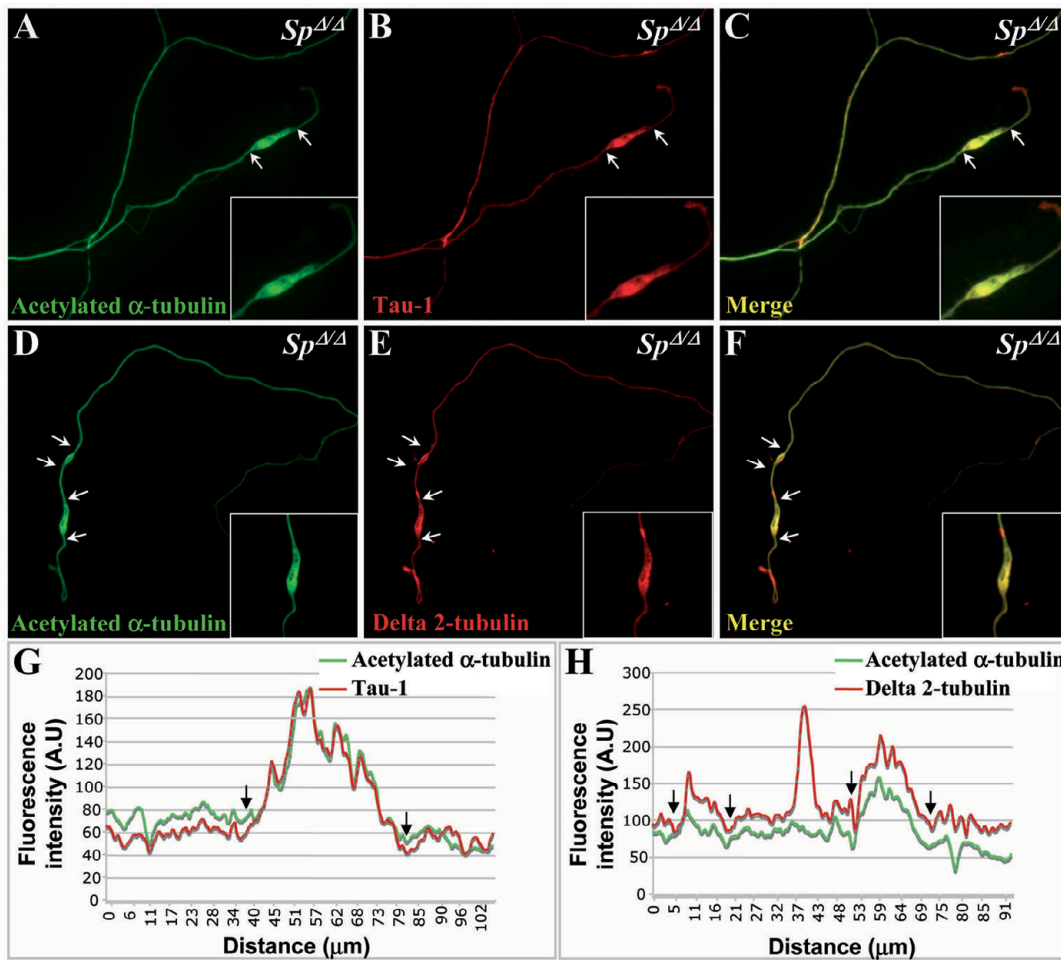

**Fig. S2. Excessive stabilization of microtubules in axonal swellings of  $Sp^{-/-}$  cortical neurons.** Primary cultures of DIV6  $Sp^{-/-}$  cortical neurons were immunolabeled for acetylated  $\alpha$ -tubulin (A, C, D, F) and the microtubule-stabilizing protein Tau (Tau-1; B, C) or delta 2-tubulin, a marker of very long-lived microtubules (E, F). Insets show higher magnifications of axonal swellings. The accumulation of Tau and the two markers of long lived microtubules (acetylated  $\alpha$ -tubulin and delta 2-tubulin) within the swellings strongly suggest that microtubules are abnormally stabilized in this axonal region. Scale bars: (A-F) 50  $\mu$ m; (insets) 10  $\mu$ m. (G-H) Quantitative fluorescence intensity profile of acetylated  $\alpha$ -tubulin and Tau-1 (G) or acetylated  $\alpha$ -tubulin and delta 2-tubulin (H) within and on either side of the swellings. Arrows indicate the proximal and distal parts of the swellings.

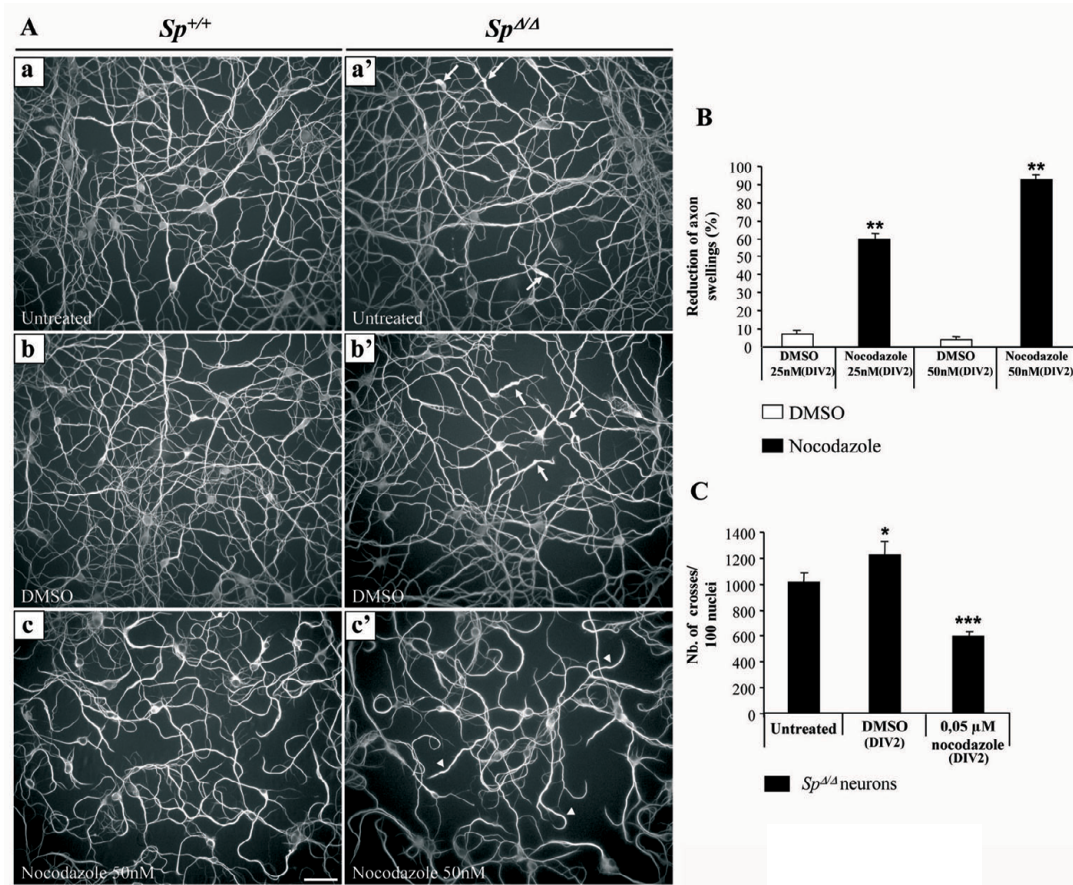

**Fig. S3. Nocodazole treatment at DIV2 prevents the formation of axonal swellings but affects *Sp*<sup>-/-</sup> cortical axon outgrowth.** (A) Immunolabeling of acetylated  $\alpha$ -tubulin on DIV6 primary cultures of *Sp*<sup>+/+</sup> (Aa-Ac) and *Sp*<sup>-/-</sup> (Aa'-Ac') cortical neurons untreated (Aa, Aa') or treated 2 days post-plating with 50 nM nocodazole (Ac, Ac') or with an equivalent volume of DMSO (Ab, Ab'). Note the absence of axonal swellings in the distal region of *Sp*<sup>-/-</sup> cortical neurons treated with nocodazole (Ac'; arrowheads) compared with untreated or DMSO-treated *Sp*<sup>-/-</sup> neurons (arrows). Scale bar: 50  $\mu$ m. (B). The percentage of axonal swellings in *Sp*<sup>-/-</sup> cortical neurons was evaluated at DIV6. Note that 50 nM nocodazole significantly decreases the proportion of neurite swellings in primary cultures of *Sp*<sup>-/-</sup> neurons compared with DMSO-treated cultures. Asterisks indicate statistically different percentages between DMSO-treated neurons and 50 nM nocodazole-treated cells (\*\* $P < 0.001$ ). Vertical bars indicate s.e.m. (C). Analysis of neurite outgrowth at DIV6 in primary cultures of *Sp*<sup>-/-</sup> neurons treated with 50 nM nocodazole or with an equivalent volume of DMSO. The treatment of *Sp*<sup>-/-</sup> neurons with nocodazole at DIV2 dramatically and significantly affects neurite outgrowth compared with DMSO control treatment ( $P < 0.0001$ ). More than 1000 neurons were analyzed in each condition.
